# Supplementary material for: An optimized impedance matching construction strategy: carbon nanofibers inlaid with Ni nanocrystals by electrospinning for high-performance microwave absorber
Source: Royal Society of Chemistry journal article supplement (doi:10.1039/d4ra03367a), 2024-01-01
Supplement: d4ra03367a1.pdf [file d4ra03367a1.pdf]

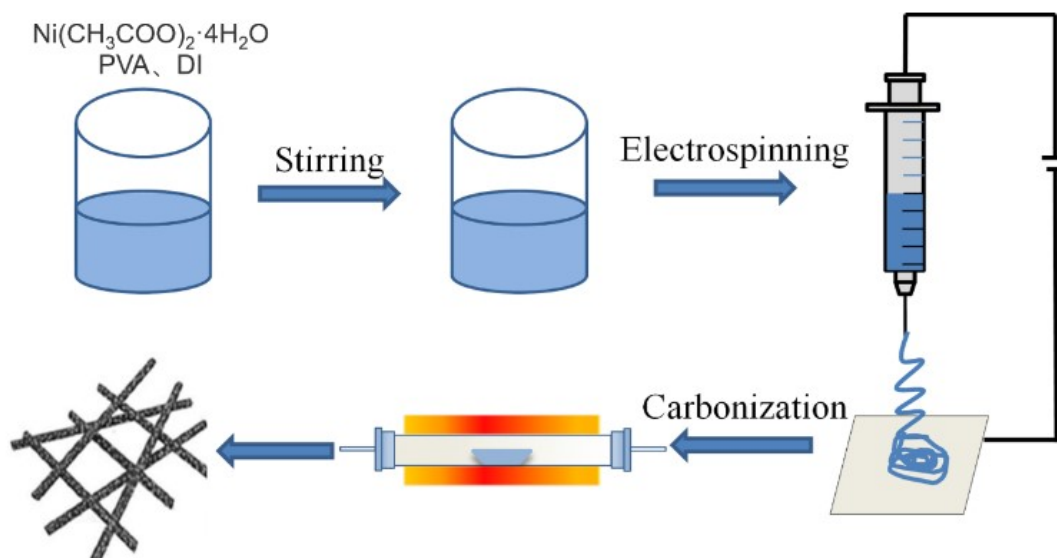

**Fig.1** Sketch map of manufacture procedure of Ni/C nanofibers

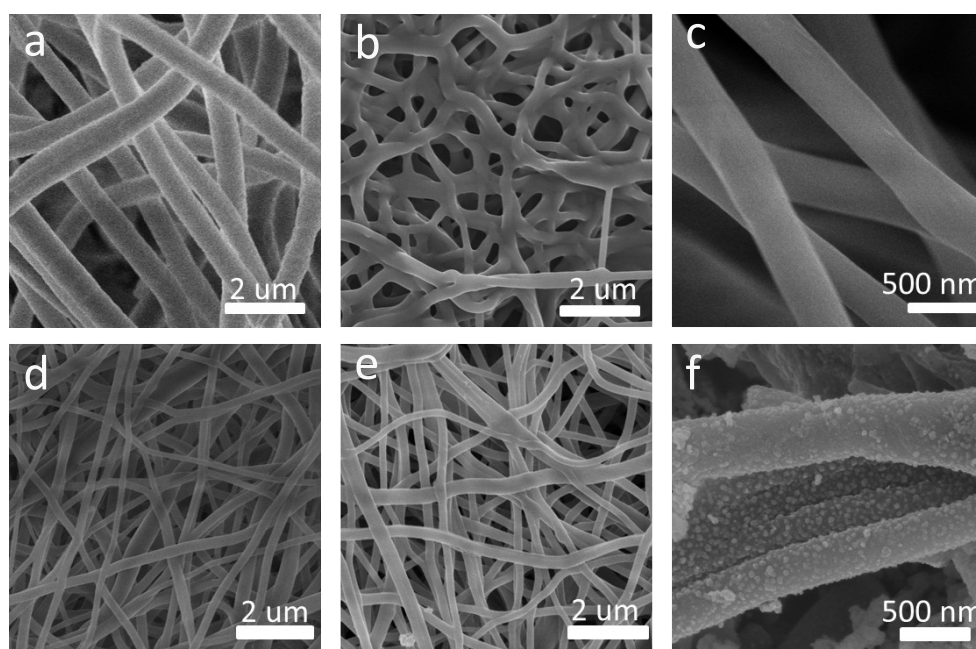

**Fig. 2** SEM images of pure PVA fibers (a); Carbon nanofibers carbonized at 600°C for 2 h (b and c); Uncarbonized Ni /PVA-based fibres (d); Ni /C nanofibers carbonized at 600°C for 2 h (e and f)

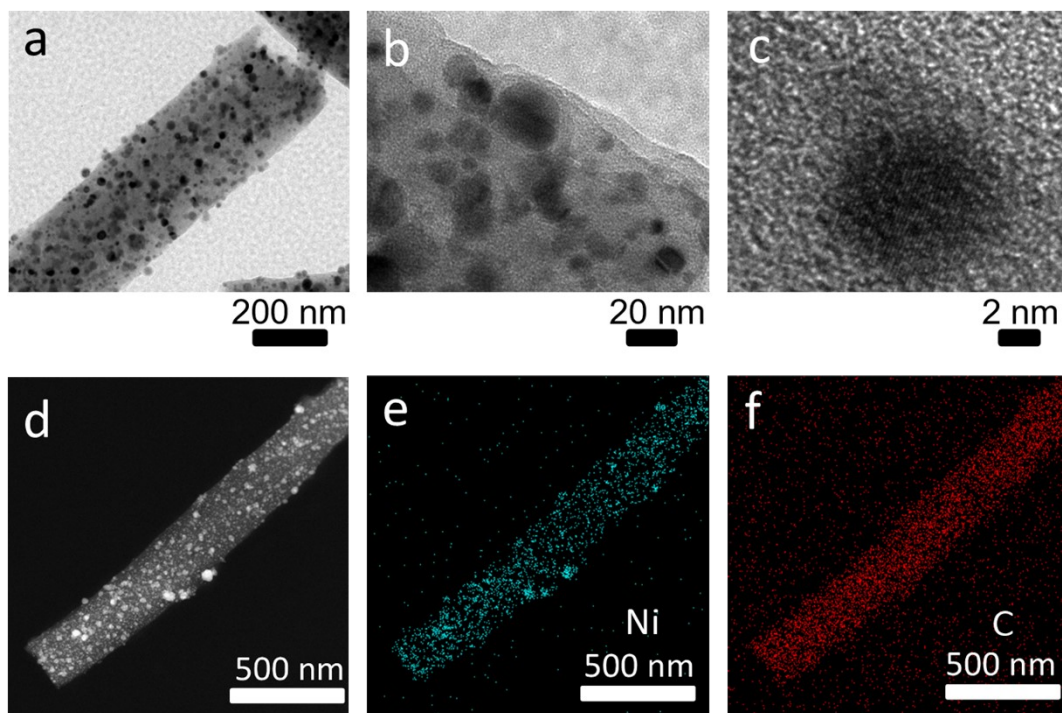

**Fig. 3** TEM images of Ni /C nanofibers (a, b and c); Elemental mapping images of fibrous nano-Ni /C composites (d, e and f)

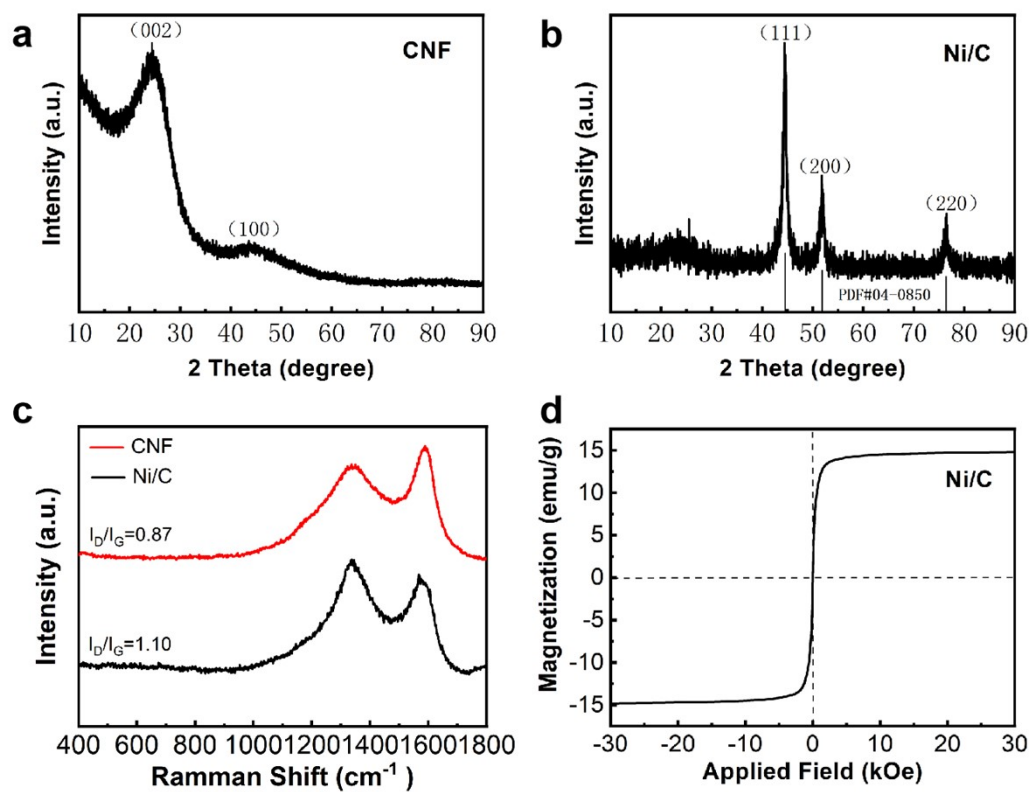

**Fig. 4** XRD image of carbon nanofibers (a); XRD image (b), raman spectra (c) and hysteresis loops (d) of Ni/C nanofibers

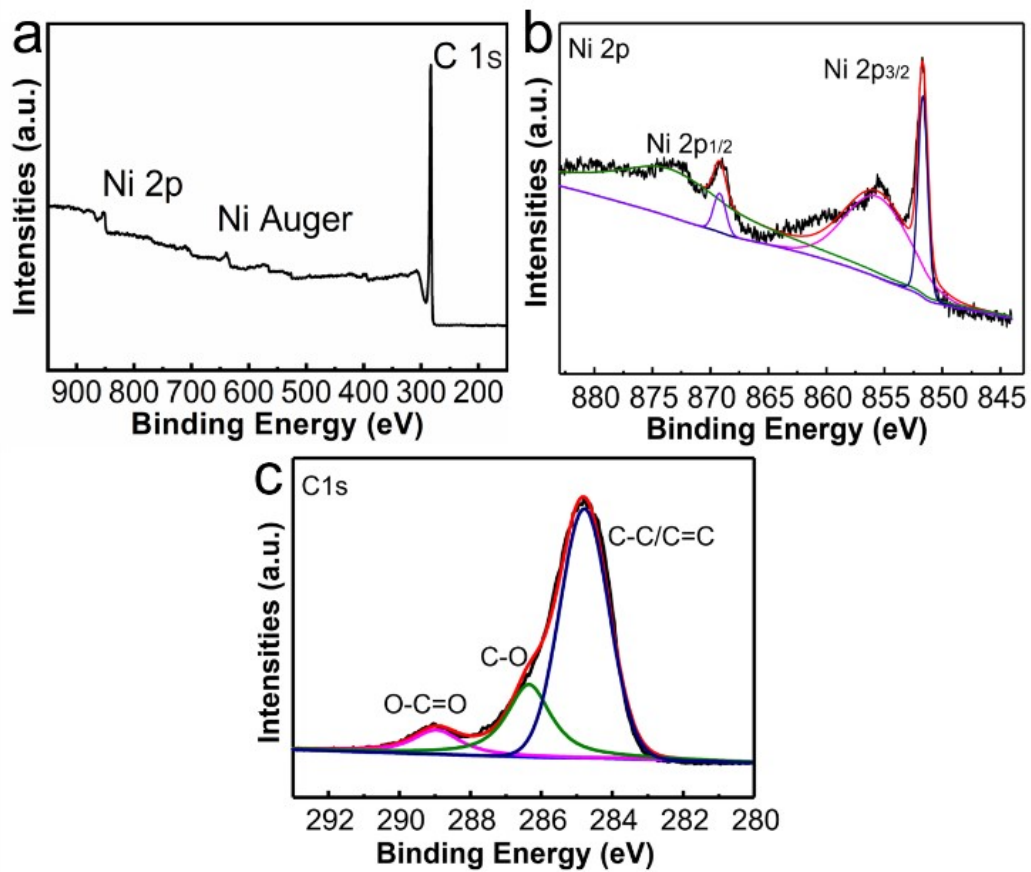

**Fig. 5** XPS spectra of Ni/C nanofibers: The survey scans (a), Ni 2p spectrum (b) and C 1s spectrum (c) of Ni/C nanofibers

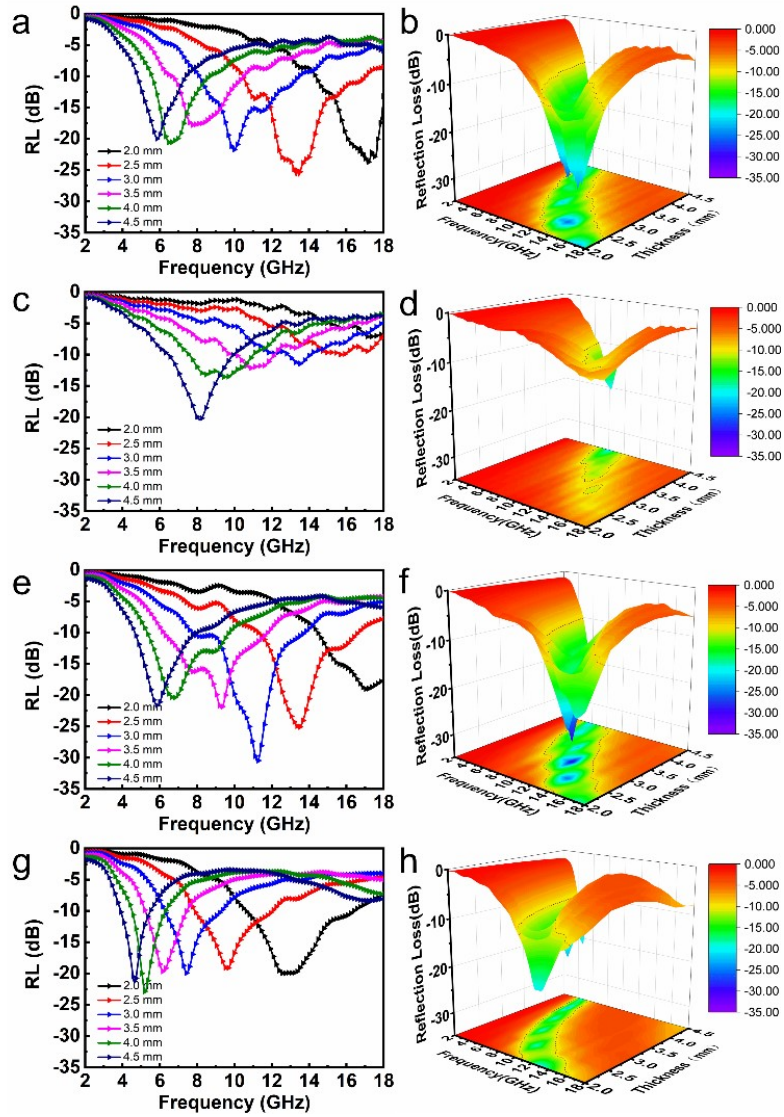

**Fig.6** The RL curves, 3D RL map between thickness of 2-4.5 mm of CNF-50%(a,b), Ni/C-30%(c,d), Ni/C-50%(e,f) and Ni/C-70%(g,h)

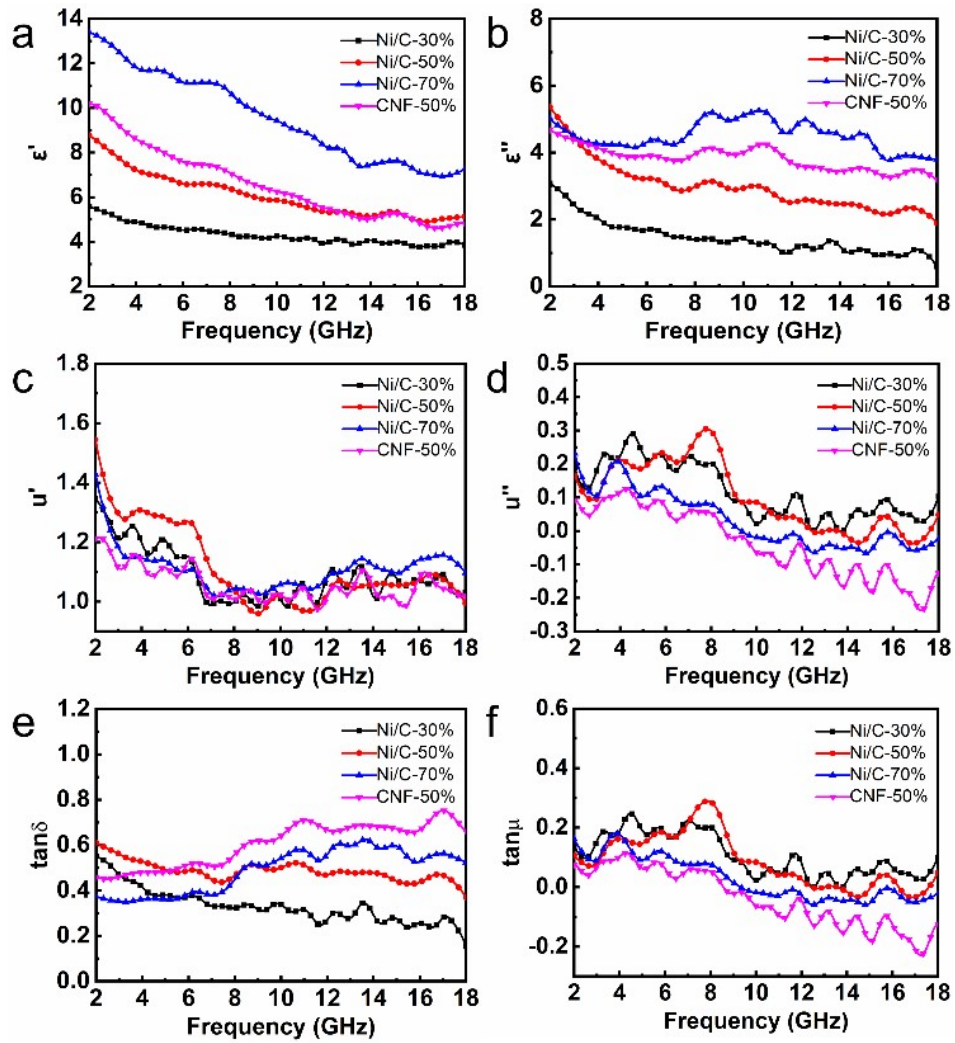

**Fig. 7** Real(a) and imaginary(b) parts of complex permittivity, real(c) and imaginary(d) parts of complex permeability, dielectric loss tangents(e) and magnetic loss tangents (f) of Ni/C-30%, Ni/C-50%, Ni/C-70%, and CNF-50%

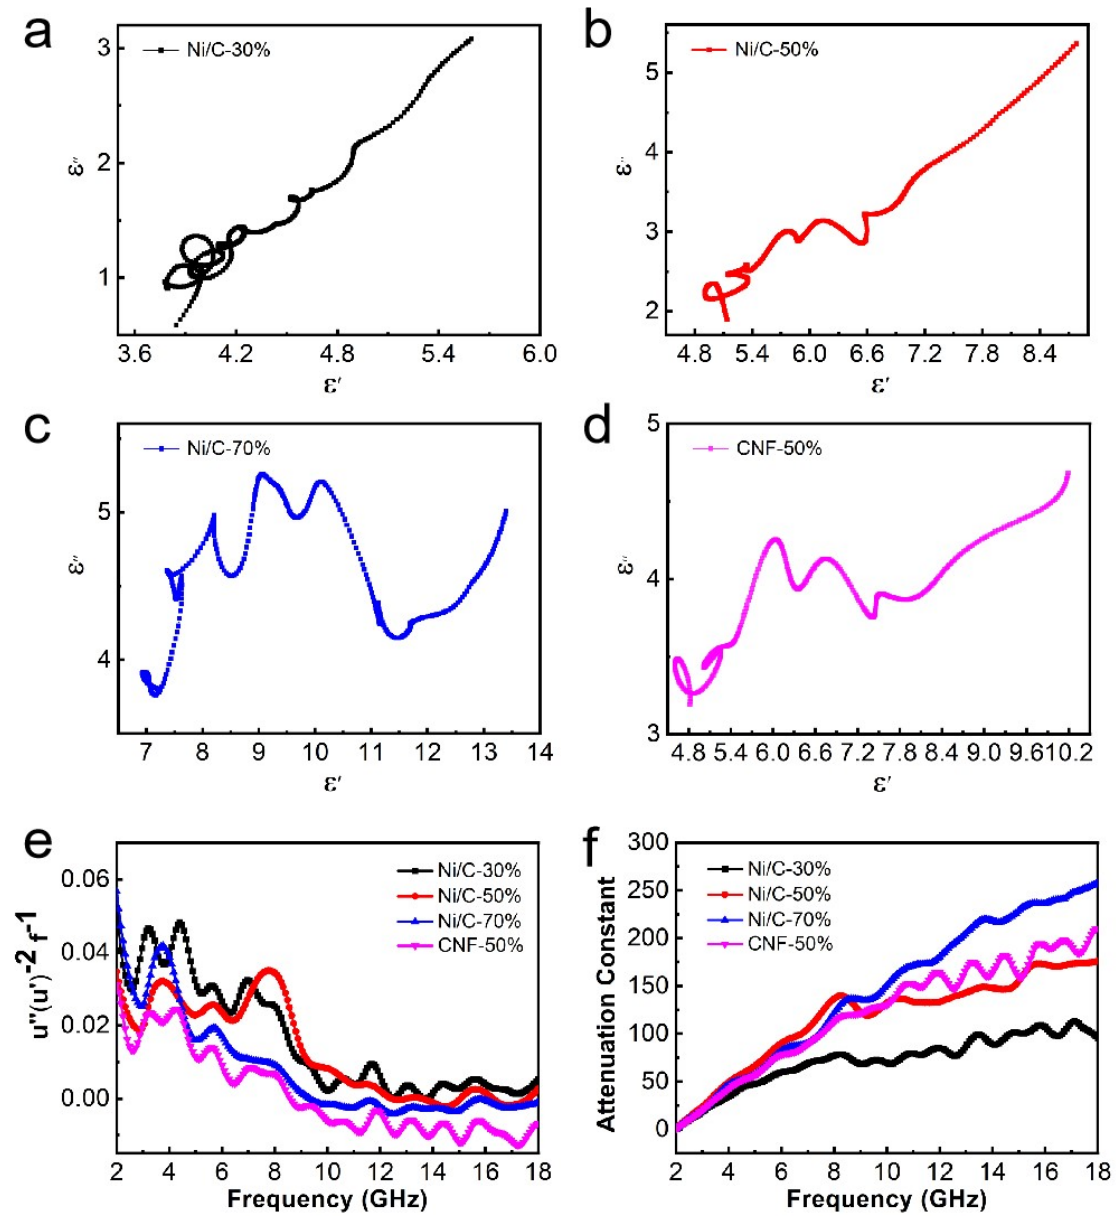

**Fig. 8** Curves of  $\epsilon''$  versus  $\epsilon'$  (Cole–Cole semicircles) for Ni/C-30% (a), Ni/C-50% (b), Ni/C-70% (c), and CNF-50% (d). Frequency dependences of  $\mu''(\mu')^{-2}f^{-1}$  for 30%, 50% and 70% of Ni/C nanofibers (e). attenuation constant (f) for Ni/C-30%, Ni/C-50%, Ni/C-70%, and CNF-50%

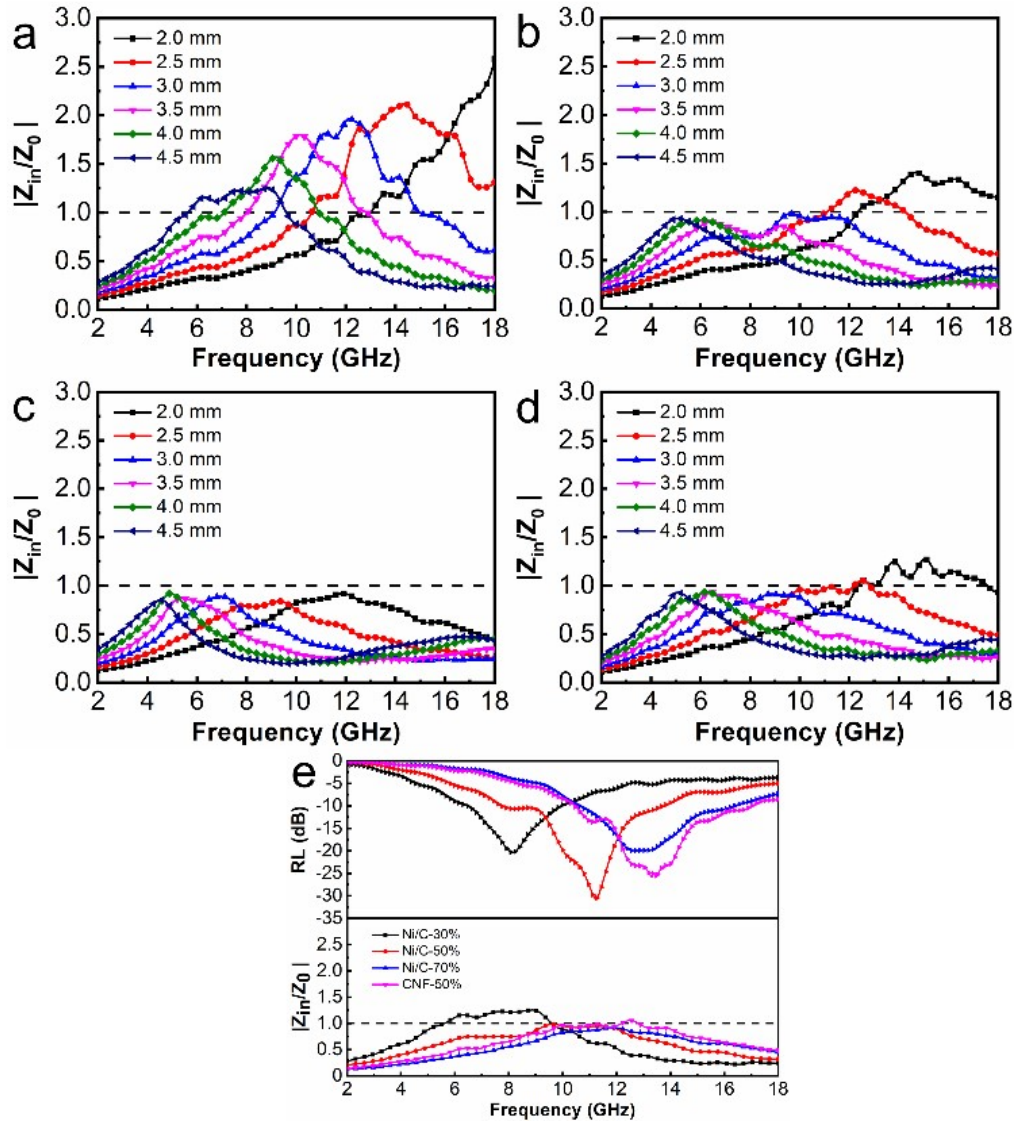

**Fig. 9** The values of  $|Z_{in}/Z_0|$  as a function of frequency for various thicknesses for Ni/C-30% (a), Ni/C-50% (b), Ni/C-70% (c), and CNF-50% (d). Reflection loss and impedance matching for optimal microwave absorption performance over all samples

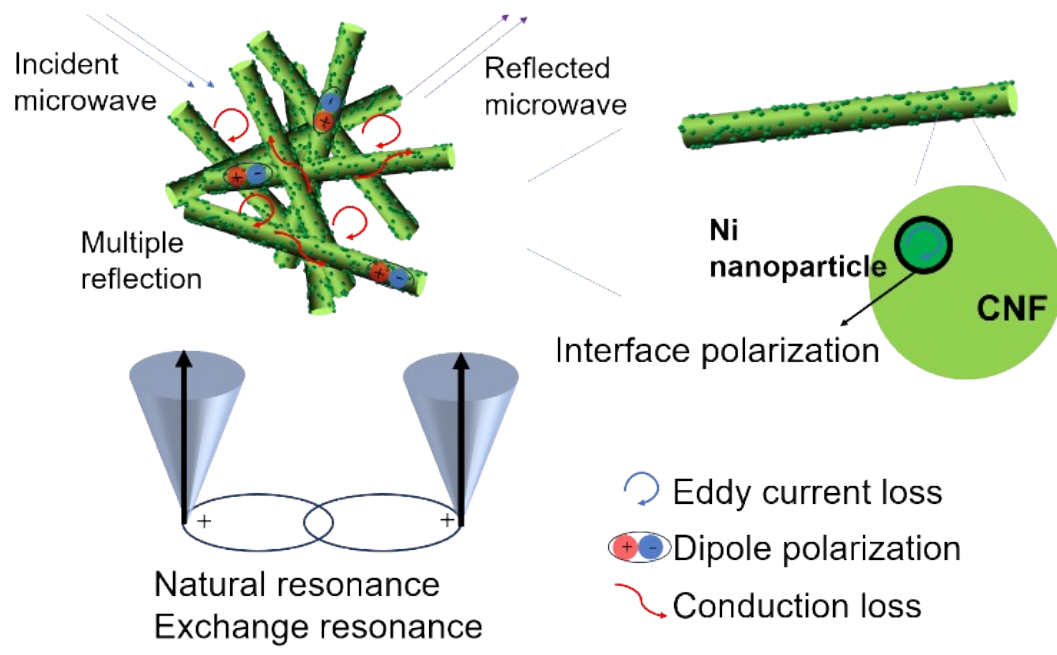

**Fig.10** Microwave absorption mechanism of Ni/C nanofibers
